# Supplementary material
Source: PubMed Central journal article supplement (PMC4148794)
Supplement: AEM.01460-14_zam999105520so1.pdf [file AEM.01460-14_zam999105520so1.pdf]

## 1 **Supplementary Material**

2 **Figure S1:** Overview of the upstream (A) and downstream (B) analysis pipeline. A detailed  
3 description of the single analysis steps is provided in the Materials and Methods chapter.

4  
5 **Figure S2:** Collectors curves and Shannon diversity indices for the tested metagenomes  
6 from Sisters Peak (SP), Juan de Fuca (JdF), Mariana Trough (MT) and Brazos Trinity Basin  
7 (BTB) based on taxonomic assignments at species, genus, family, order, class and phylum  
8 level.

9  
10 **Figure S3:** Analysis of the variability of SP metagenome sequences recruited to the  
11 reference genomes of *Aciduliprofundum* sp. MAR08-339 and *Aciduliprofundum boonei* T469.

12  
13 **Figure S4:** Recruitment plots of SP metagenome fragments to the reference genomes of  
14 *Aciduliprofundum* sp. MAR08-339 (A), *Aciduliprofundum boonei* T469 (B), *Hippea maritima*  
15 DSM10411 (C), *Caldisericum exile* AZM16c01 (D) and *Niastella koreensis* GM20-10 (E).

16 From the outside to the inside: the outer two tracks (track 1 and 2) are protein encoding genes,  
17 color-coded according to COG categories, on the forward and reverse strand of the reference  
18 genome. Track 3 denotes tRNAs (blue) and rRNAs (red) genes in the reference genome.

19 Track 4 indicates the GC content of the reference genome, where red and blue coloring mark  
20 GC content, respectively, above or below the overall GC content of the reference genome.

21 Green bars in track 5 indicate IslandViewer genomic island predictions. The scatter plot in  
22 track 6 represents the fragment recruitment of the SP metagenome assembly to the reference  
23 genome. Each dot represents the maximum identity value among the hits for a window of 30  
24 bp. Red and blue dots represent blastn hits and tblastx hits, respectively. The y-axis goes from  
25 75% (inside) to 100% identity (outside); a green line is drawn at the 95% level.

26 **Figure S1**

27 **A**

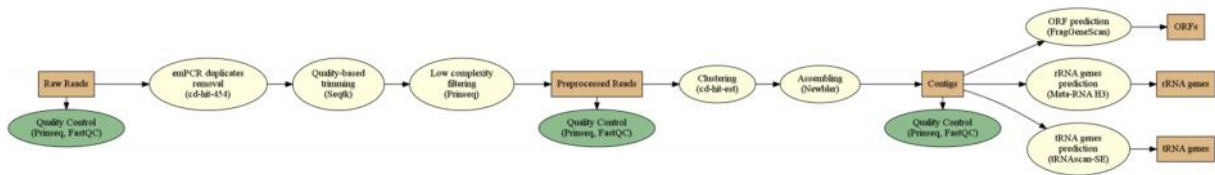

28

29 **B**

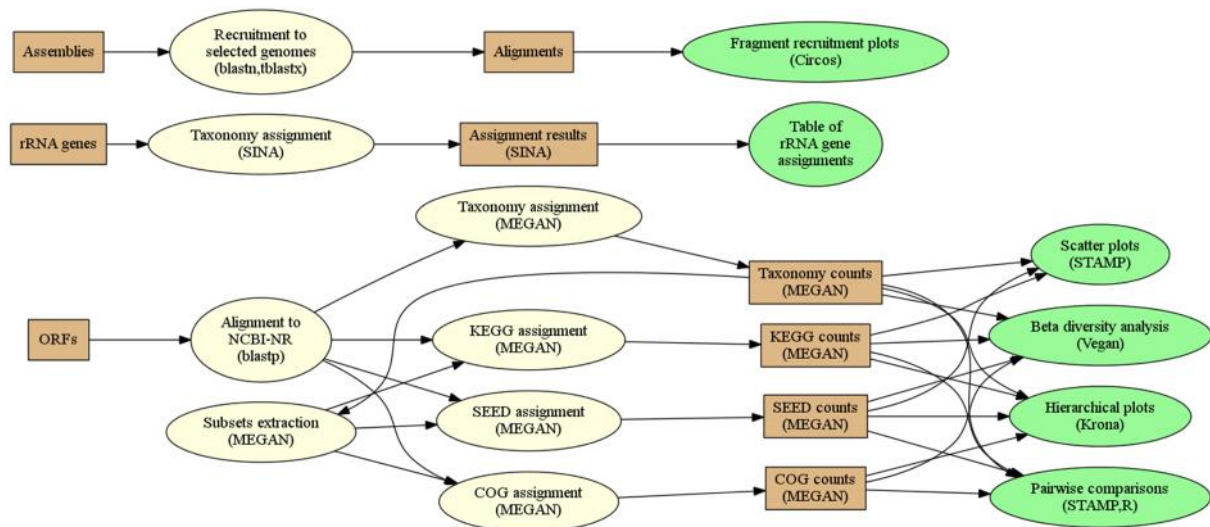

30

31 **Figure S2**

Number of Assignments

Rank: Species

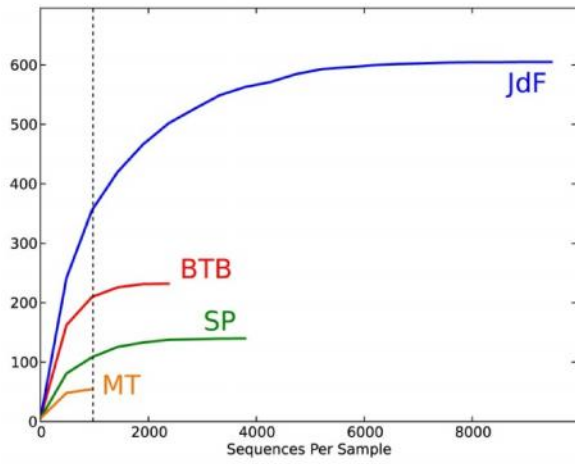

Rank: Genus

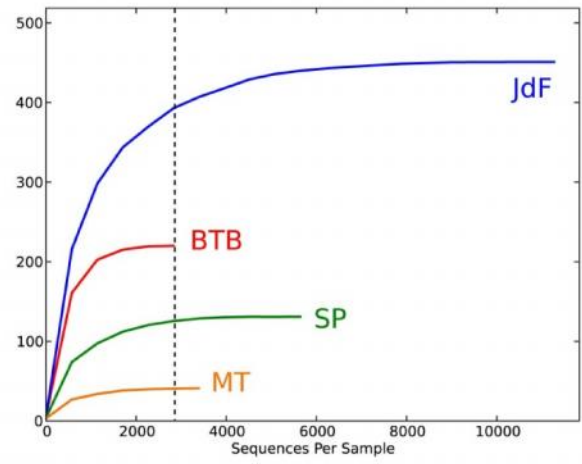

Rank: Family

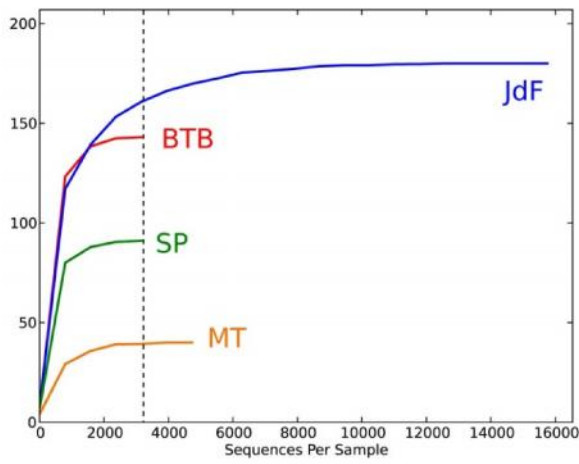

Rank: Order

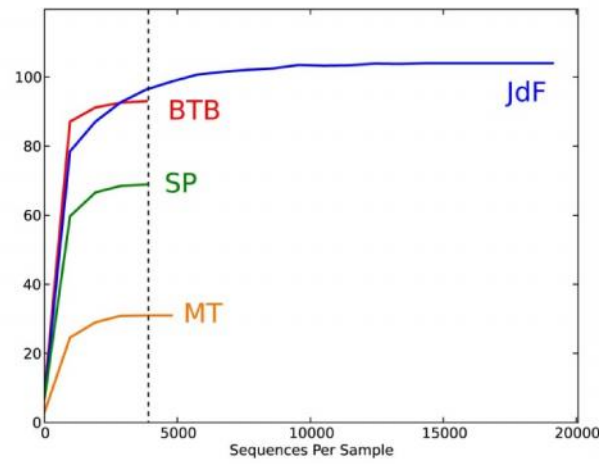

Rank: Class

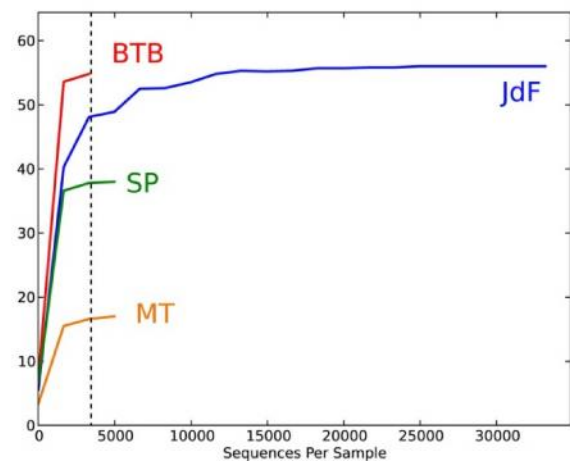

Rank: Phylum

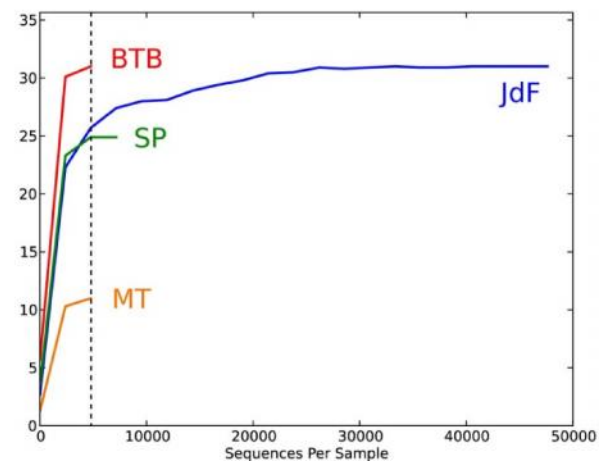

32

33

Shannon index

Rank: Species

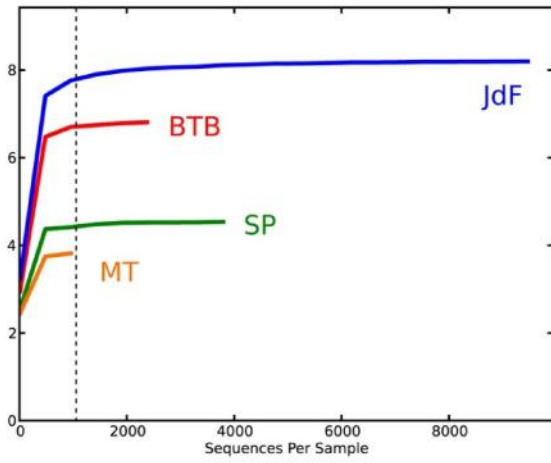

Rank: Genus

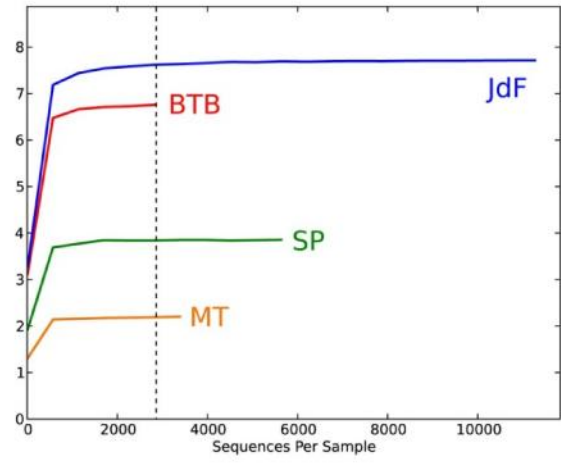

Rank: Family

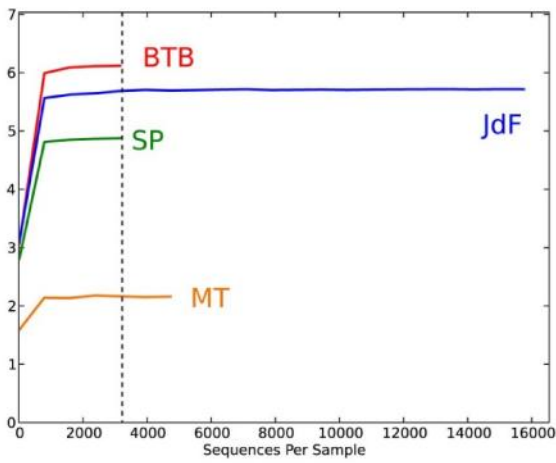

Rank: Order

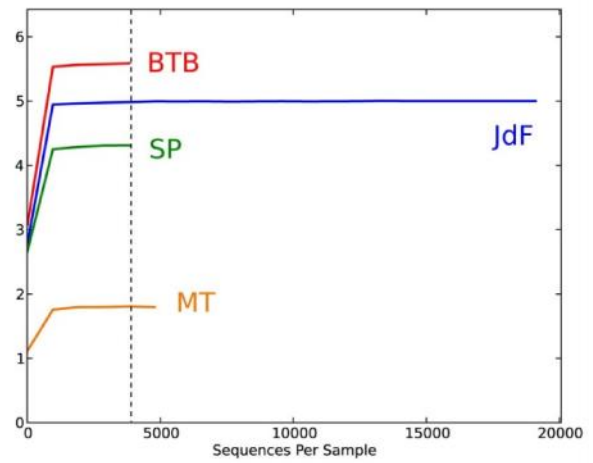

Rank: Class

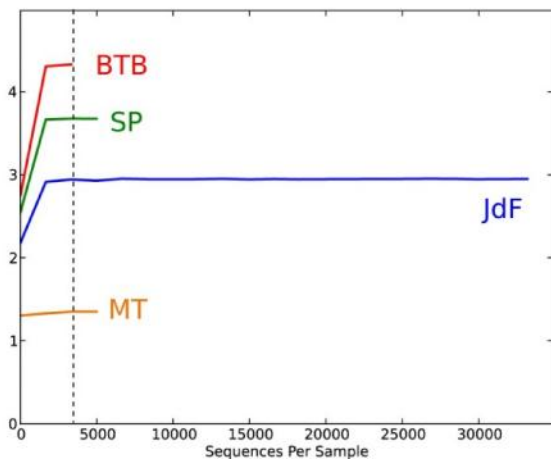

Rank: Phylum

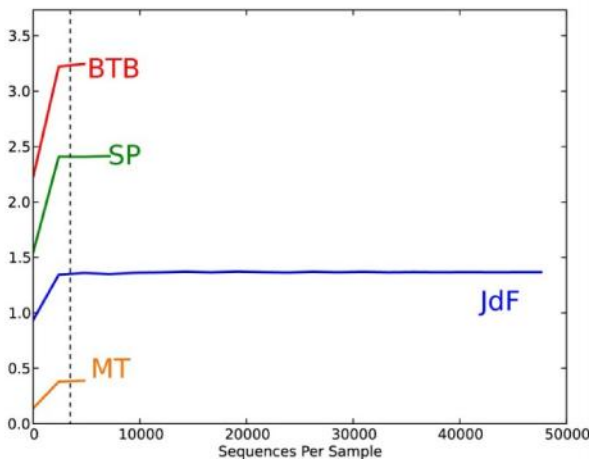

34

35

36 **Figure S3**

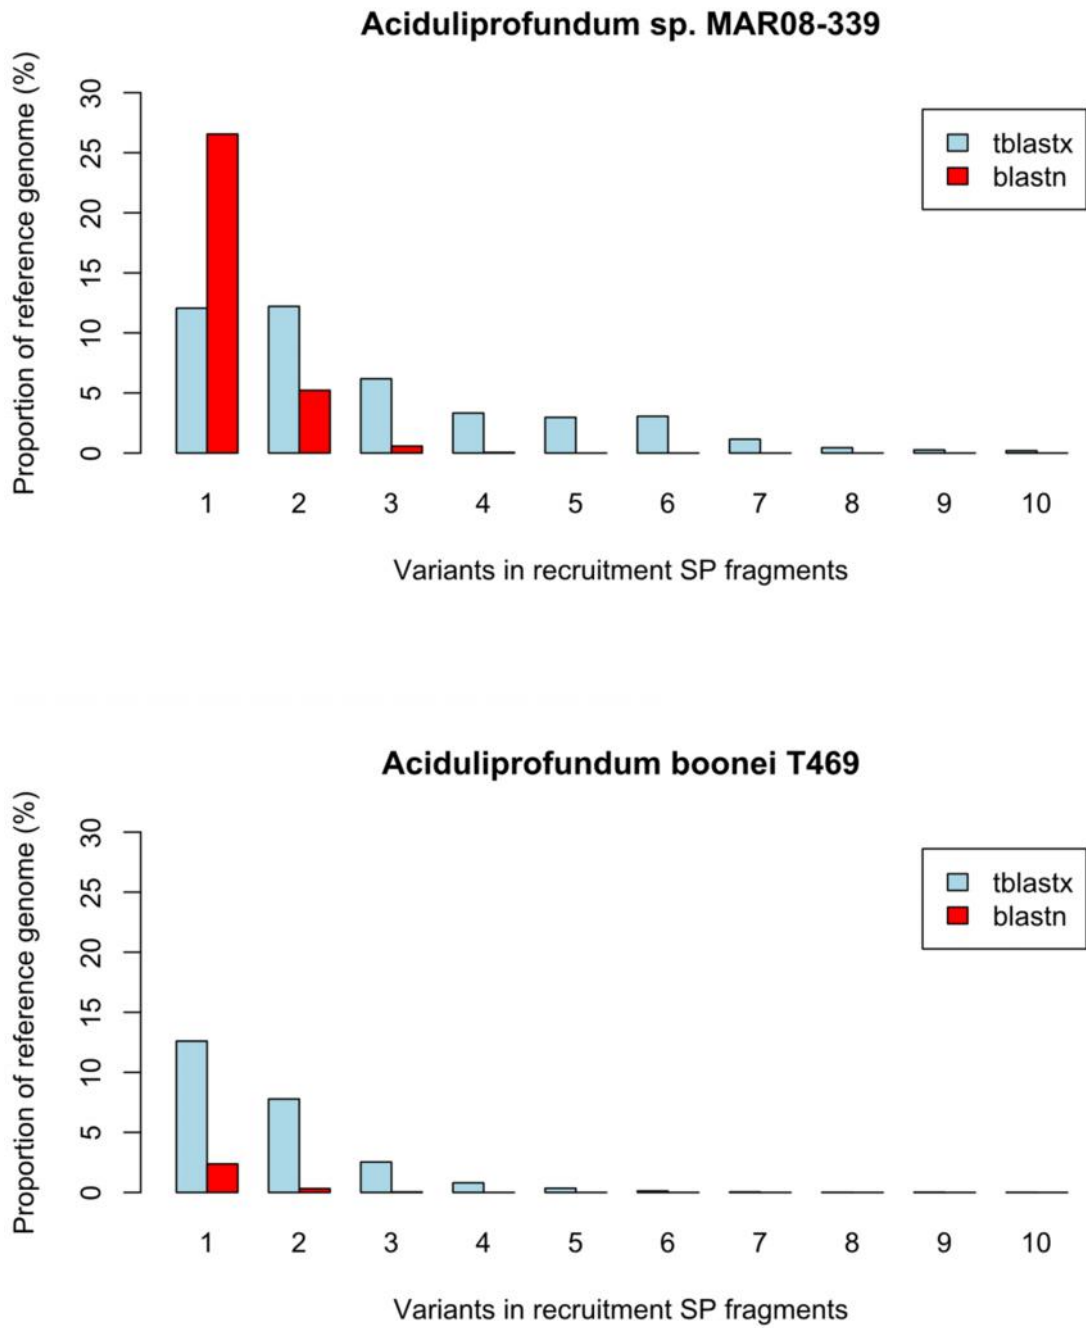

37

38 **Figure S4**

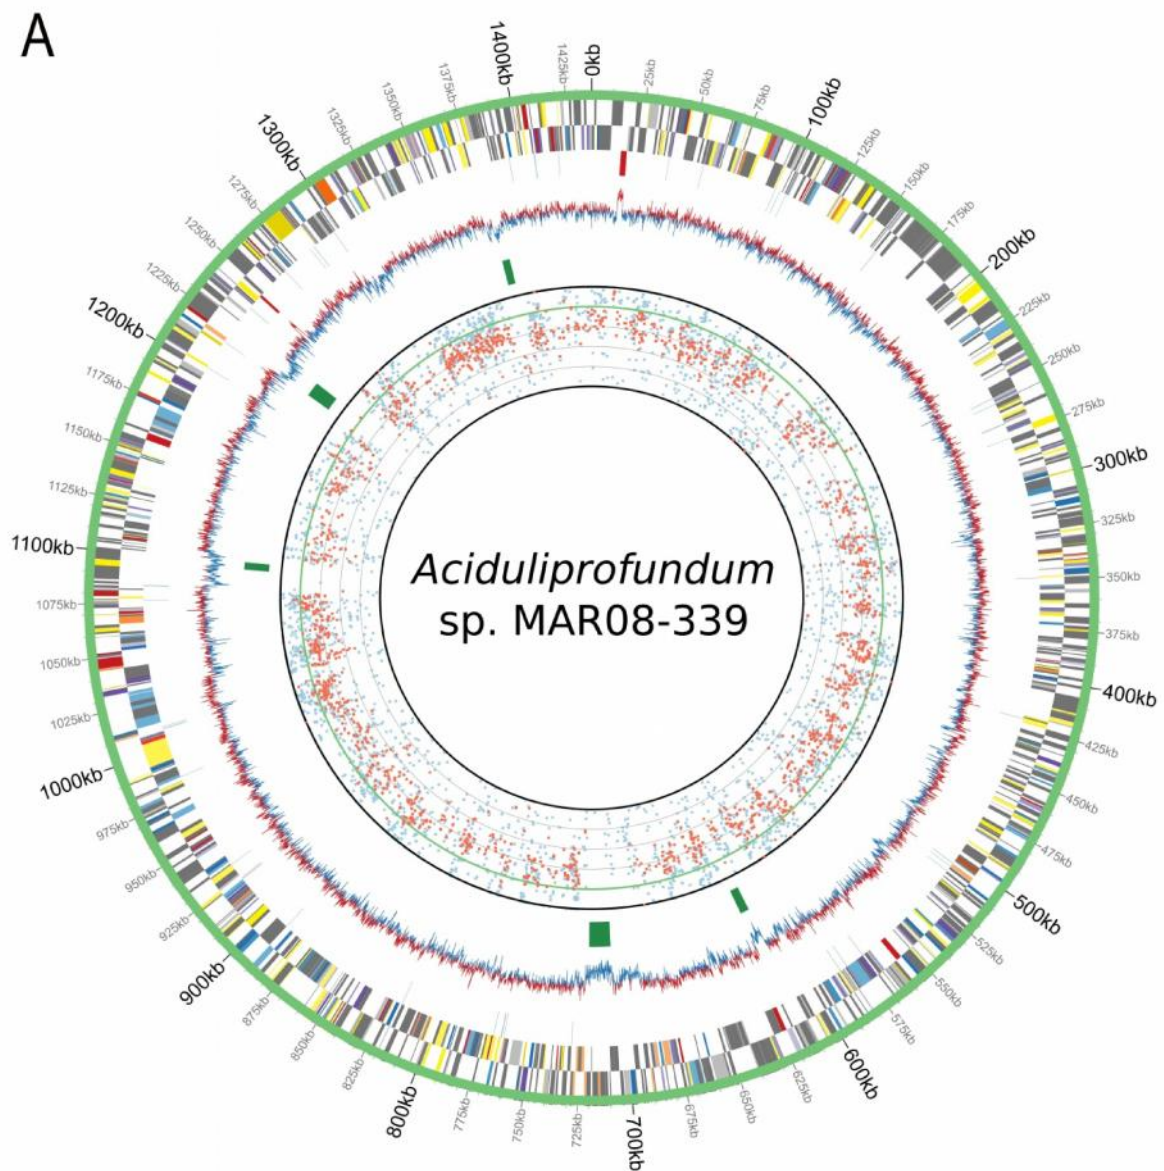

39

40



**B**

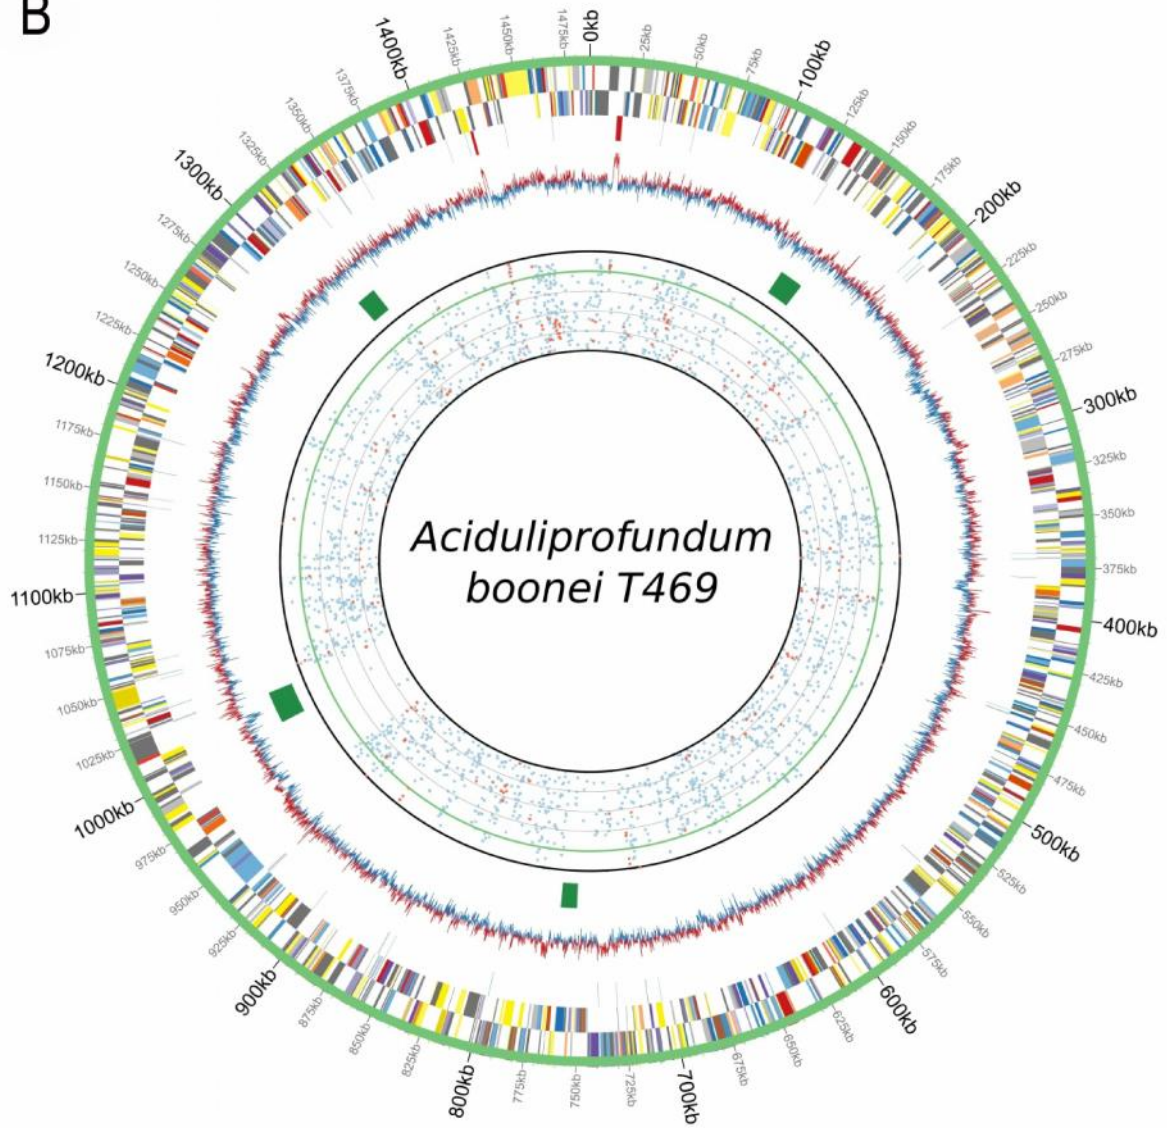

41

42

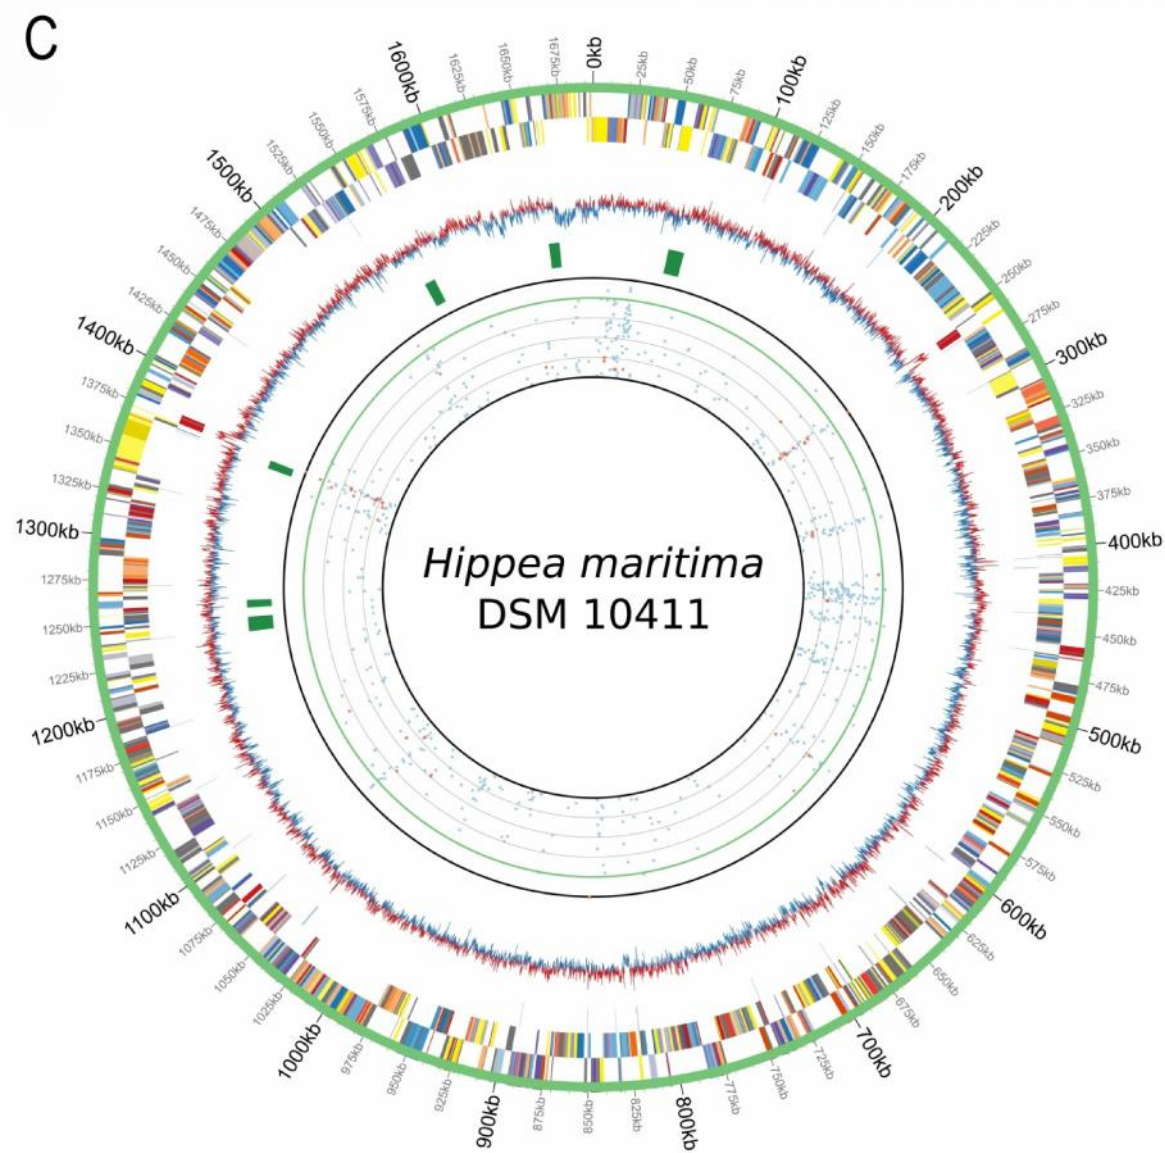



D

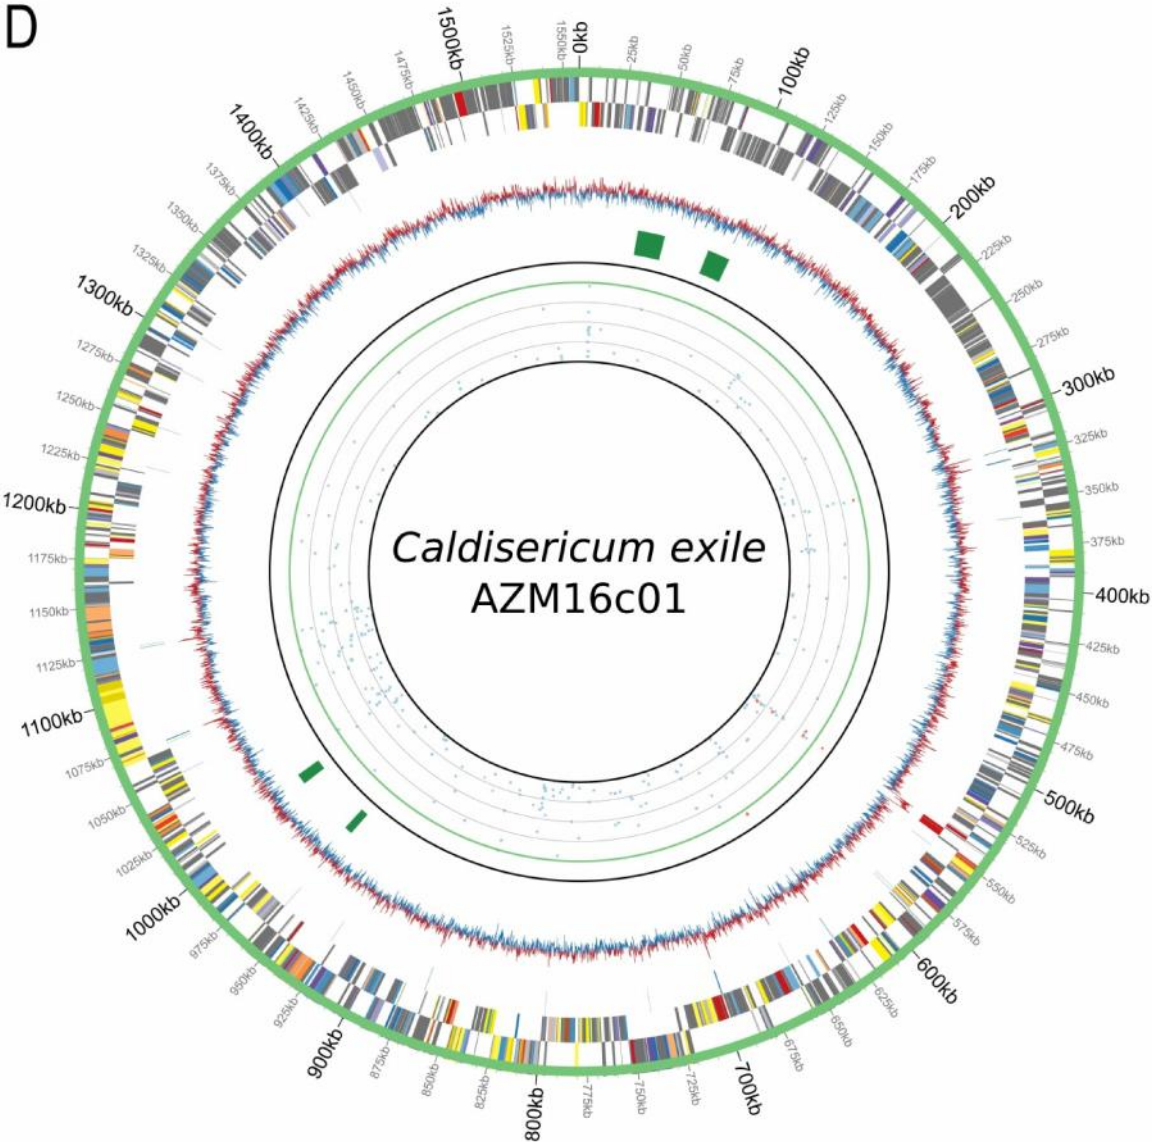

44

45

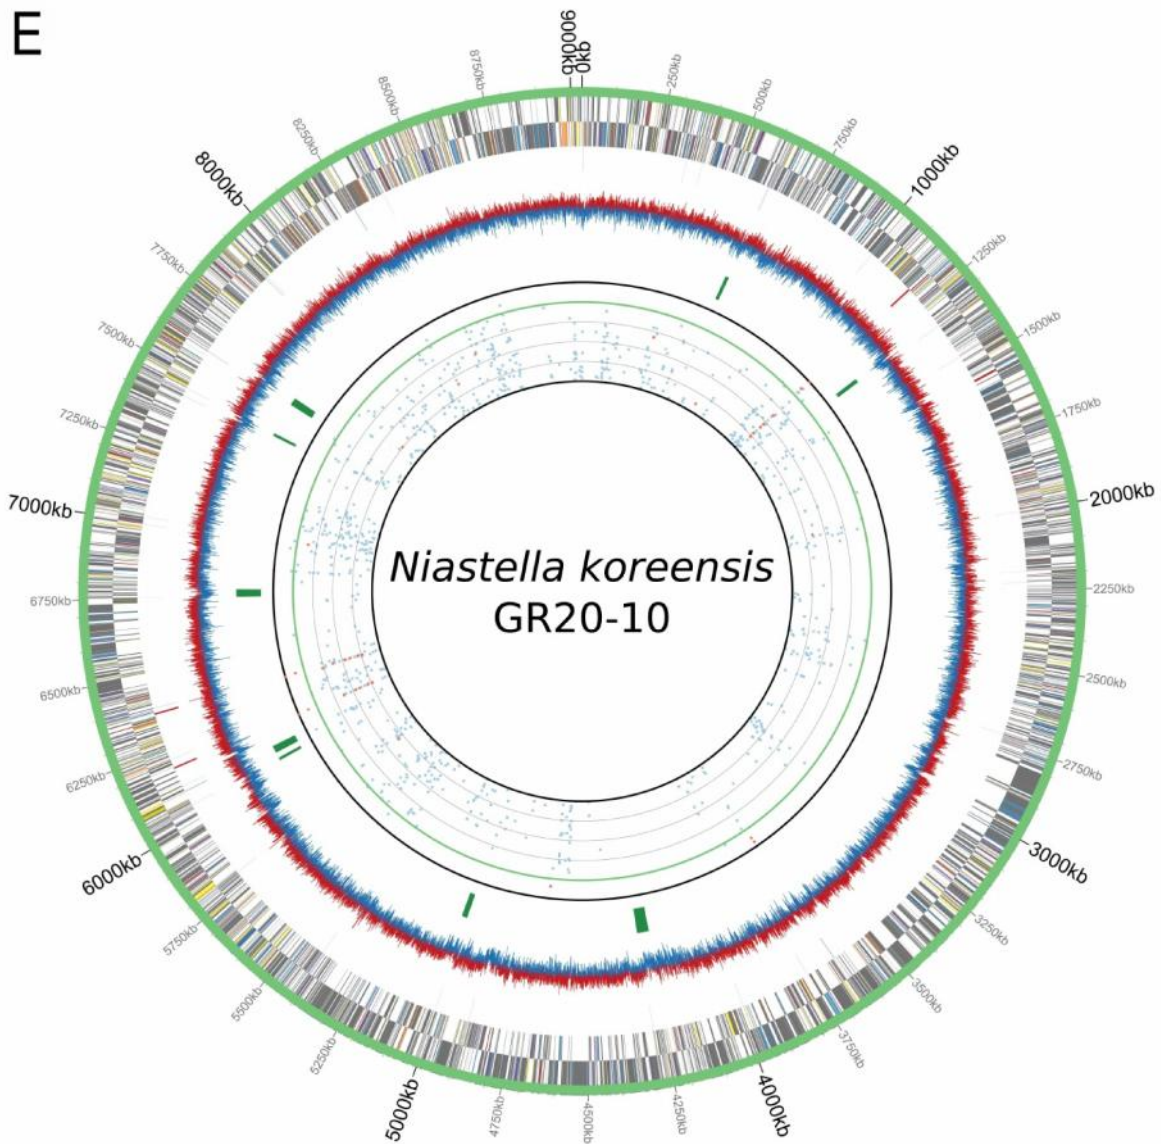

46

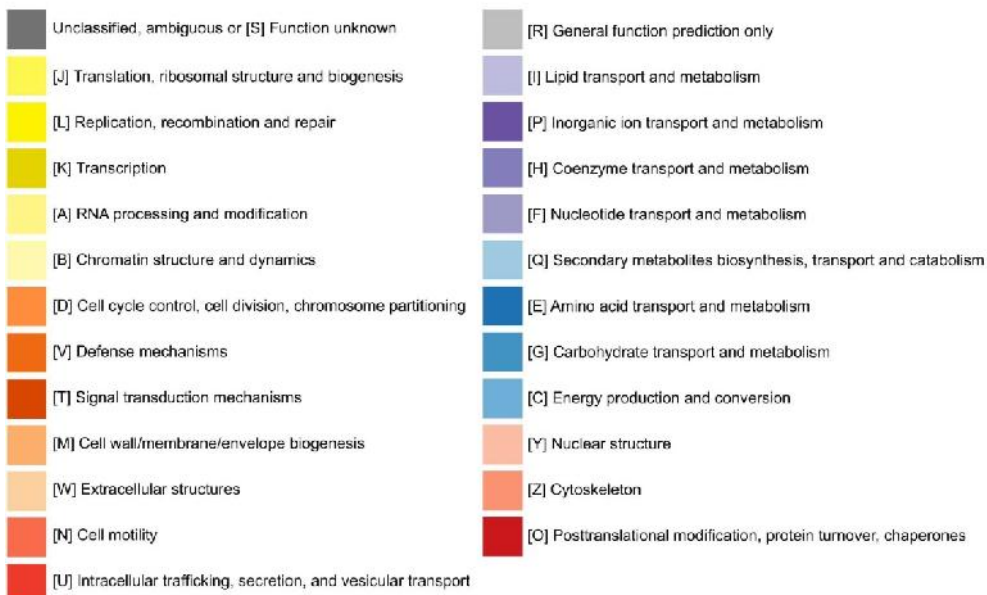

47

48 **Table S1: Metadata of sequenced metagenomes used for comparison**

| Location                                                                  | DNA source                  | NCBI SRA<br>Accession | raw reads       |                    | after dereplication/<br>filtering/trimming |                    | after<br>98%id clustering |                    | assembly        |                        | gene prediction<br>and alignment |                         |
|---------------------------------------------------------------------------|-----------------------------|-----------------------|-----------------|--------------------|--------------------------------------------|--------------------|---------------------------|--------------------|-----------------|------------------------|----------------------------------|-------------------------|
|                                                                           |                             |                       | total<br>length | number<br>of reads | total<br>length                            | number<br>of reads | total<br>length           | number<br>of reads | total<br>length | number of<br>sequences | number of<br>ORFs                | with hits to<br>NCBI-NR |
| <u>marine hydrothermal vent samples</u>                                   |                             |                       |                 |                    |                                            |                    |                           |                    |                 |                        |                                  |                         |
| <b>Sisters Peak</b><br>(southern Mid-Atlantic<br>ridge)                   | MDA<br>(REPLI-g Kit)        | SRA047926             | 340<br>Mbp      | 875,069            | 113<br>Mbp                                 | 333,597            | 21<br>Mbp                 | 60,929             | 8<br>Mbp        | 23,933                 | 24,055                           | 12,112<br>(50.4%)       |
| <b>Juan de Fuca</b><br>(eastern Pacific ridge)                            | fosmid library<br>(pCC1FOS) | SRR029255             | 133<br>Mbp      | 578,567            | 43<br>Mbp                                  | 197,775            | 36<br>Mbp                 | 157,198            | 25<br>Mbp       | 101,011                | 100,478                          | 70,157<br>(69.8%)       |
| <b>Mariana Trough</b><br>(western Pacific back-arc<br>basin) <sup>1</sup> | MDA<br>(REPLI-g Kit)        | SRR016610             | 56<br>Mbp       | 323,700            | 13<br>Mbp                                  | 67,820             | 6<br>Mbp                  | 31,087             | 4<br>Mbp        | 17,170                 | 16,230                           | 7,132<br>(43.9%)        |
| <u>marine non-vent samples</u>                                            |                             |                       |                 |                    |                                            |                    |                           |                    |                 |                        |                                  |                         |
| <b>Brazos-Trinity Basin</b><br>(Gulf of Mexico)                           | MDA<br>(REPLI-g Kit)        | SRR023396             | 106<br>Mbp      | 546,127            | 52<br>Mbp                                  | 254,571            | 29<br>Mbp                 | 127,421            | 11<br>Mbp       | 45,818                 | 44,516                           | 19,948<br>(44.8%)       |

49 All the metagenomes were pyrosequenced using Titanium chemistry. The metagenomic data are derived from Sisters Peak (this study), Juan de Fuca (1), Mariana Trough (2) and  
50 Brazos Trinity Basin (3). The raw reads from all locations were clustered, processed and normalized as described in material and methods. <sup>1</sup>The metagenomic data is derived  
51 from the fluid 0.1 – 0.2 µm particle size fraction.

52

53

54

55 **Table S2: Summary of the taxonomic and functional assignment results.**

| Metagenome                  | Genes with hits in NCBI-NR | Taxonomic assignments | SEED functional assignments | KEGG functional assignments | COG functional assignments |
|-----------------------------|----------------------------|-----------------------|-----------------------------|-----------------------------|----------------------------|
| <b>Sisters Peak</b>         | 12,112                     | 11,419<br>(94.3%)     | 4,842<br>(40.0%)            | 7,078<br>(58.4%)            | 8,844<br>(73.0%)           |
| <b>Juan de Fuca</b>         | 70,157                     | 65,899<br>(93.9%)     | 33,162<br>(47.3%)           | 45,187<br>(64.4%)           | 57,780<br>(82.3%)          |
| <b>Mariana Trough</b>       | 7,132                      | 6,597<br>(92.5%)      | 2,922<br>(41.0%)            | 3,729<br>(52.3%)            | 5,499<br>(77.1%)           |
| <b>Brazos-Trinity Basin</b> | 19,948                     | 17,434<br>(87.4%)     | 8,885<br>(44.5%)            | 12,282<br>(61.6%)           | 15,028<br>(75.3%)          |

56 Taxonomic and functional assignments of genes in the analyzed metagenomes according to MEGAN. The relative values (percentage) refer to the total number of genes with at  
57 least one significant (E-value < 0.001) blastp hit in NCBI-NR.

58

59

60

61

62

63

64

65 **Table S3: Taxonomic assignment of predicted rRNA genes.**

|                               | Count | Assignment                                                                                                                      |
|-------------------------------|-------|---------------------------------------------------------------------------------------------------------------------------------|
| <b>16S<br/>rRNA<br/>genes</b> | 6     | Archaea; Euryarchaeota; Thermoplasmata; Thermoplasmatales; Deep Sea Hydrothermal Vent Gp 2 (DHVE2)                              |
|                               | 1     | Archaea; Euryarchaeota; Thermoplasmata; Thermoplasmatales; Deep Sea Hydrothermal Vent Gp 2 (DHVE2); Candidatus Aciduliprofundum |
|                               | 1     | Bacteria                                                                                                                        |
|                               | 1     | Bacteria; Bacteroidetes                                                                                                         |
|                               | 1     | Bacteria; Deinococcus-Thermus; Deinococci; Thermales; Thermaceae                                                                |
|                               | 1     | Bacteria; Proteobacteria; Epsilonproteobacteria; Nautiliales; Nautiliaceae; Caminibacter                                        |
|                               | 2     | Bacteria; Proteobacteria; Epsilonproteobacteria; Nautiliales; Nautiliaceae                                                      |
| <b>23S<br/>rRNA<br/>genes</b> | 17    | Unclassified                                                                                                                    |
|                               | 3     | Archaea; Euryarchaeota; Thermoplasmata; Thermoplasmatales; Family Incertae Sedis; Candidatus Aciduliprofundum                   |
|                               | 1     | Bacteria                                                                                                                        |
|                               | 2     | Bacteria; Proteobacteria; Epsilonproteobacteria                                                                                 |
|                               | 3     | Bacteria; Proteobacteria; Epsilonproteobacteria; Nautiliales; Nautiliaceae                                                      |
|                               | 2     | Bacteria; Proteobacteria; Epsilonproteobacteria; Nautiliales; Nautiliaceae; Nitratifactor                                       |
|                               | 1     | Bacteria; Proteobacteria; Epsilonproteobacteria; Campylobacterales; Helicobacteraceae; Sulfurimonas                             |

66

67

68

69



70 **Table S4: Potential genomic islands of *A. sp. MAR08-339*, respective matches in the SP metagenome and other best hits**

| SP metagenome  |                                         | <i>A. sp. MAR08-339</i> |                                                              |                                 |                  | others                            |           |
|----------------|-----------------------------------------|-------------------------|--------------------------------------------------------------|---------------------------------|------------------|-----------------------------------|-----------|
| number of hits | genomic islands range                   | best matches            |                                                              | next best blast hits in NCBI NR |                  |                                   |           |
|                |                                         | locus tag               | predicted functions                                          | e-values                        | hit taxon        | predicted functions               | e-value   |
|                | <i>potential genomic island 1</i>       |                         |                                                              |                                 |                  |                                   |           |
|                | <u>predicted range 611,663..617,498</u> |                         |                                                              |                                 |                  |                                   |           |
| 4              | predicted                               | AciM339_0710            | hypothetical protein                                         | 6,00E-35 to 2,00E-07            | <i>M. alvus</i>  | hypothetical protein MMALV_13000  | 3,00E-12  |
| 38             | predicted                               | AciM339_0711            | hypothetical protein                                         | 3,00E-89 to 1,00E-08            | <i>M. alvus</i>  | Exonuclease SBCC                  | 3,00E-36  |
| no hits        | predicted                               | AciM339_0712            | hypothetical protein                                         | -                               | no hits          |                                   |           |
| 16             | predicted                               | AciM339_0713            | putative ATPase                                              | 7,00E-51 to 6,00E-09            | <i>M. alvus</i>  | hypothetical protein MMALV_13020  | 0.0       |
| 20             | predicted                               | AciM339_0714            | NurA domain-containing protein                               | 3,00E-47 to 6,00E-16            | <i>M. alvus</i>  | hypothetical protein MMALV_13030  | 5,00E-76  |
|                | <u>extended range 611,629..620,879</u>  |                         |                                                              |                                 |                  |                                   |           |
| 1              | extended                                | AciM339_0715            | site-specific recombinase XerD                               | 6,00E-08                        | <i>A. boonei</i> | integrase family protein          | 1,00E-160 |
| 1              | extended                                | AciM339_0716            | putative nucleic-acid-binding protein containing a Zn-ribbon | 6,00E-08                        | <i>A. boonei</i> | protein of unknown function DUF35 | 8,00E-84  |
| 16             | extended                                | AciM339_0717            | acetyl-CoA acetyltransferase                                 | 7,00E-38 to 8,00E-8             | <i>A. boonei</i> | acetyl-CoA acetyltransferase      | 0.0       |
| 19             | extended                                | AciM339_0718            | hydroxymethylglutaryl-CoA synthase, putative                 | 6,00E-25 to 2,00E-6             | no hits          |                                   |           |

| <i>potential genomic island 2</i> |          |              |                                                                                            |                          |  |                                 |                                                                                     |           |
|-----------------------------------|----------|--------------|--------------------------------------------------------------------------------------------|--------------------------|--|---------------------------------|-------------------------------------------------------------------------------------|-----------|
| extended range 683,941..724,667   |          |              |                                                                                            |                          |  |                                 |                                                                                     |           |
| no hits                           | extended | AciM339_0781 | phosphomannomutase                                                                         | -                        |  | <i>A. boonei</i>                |                                                                                     | no hits   |
| 4                                 | extended | AciM339_0782 | adenosine deaminase                                                                        | 7,00E-22 to<br>1,00E-7   |  | <i>A. boonei</i>                | adenine deaminase                                                                   | 5,00E-156 |
| 16                                | extended | AciM339_0783 | UDP-N-acetylglucosamine<br>diphosphorylase/glucosamine-1-phosphate N-<br>acetyltransferase | 2,00E-56 to<br>7,00E-10  |  | <i>A. boonei</i>                | Nucleotidyl transferase                                                             | 0.0       |
| no hits                           | extended | AciM339_0784 | putative permease                                                                          | -                        |  | <i>A. boonei</i>                | hypothetical protein                                                                | 1,00E-87  |
| no hits                           | extended | AciM339_0785 | amino acid transporter                                                                     | -                        |  | <i>A. boonei</i>                | amino acid transporter                                                              | 0.0       |
| no hits                           | extended | AciM339_0786 | putative signal-transduction protein containing<br>cAMP-binding and CBS domains            | -                        |  | <i>A. boonei</i>                | signal transduction protein<br>with CBS domains                                     | 3,00E-35  |
| 1                                 | extended | AciM339_0787 | nucleoside-diphosphate-sugar epimerase                                                     | 4,00E-09                 |  | <i>A. boonei</i>                | NAD-dependent<br>epimerase/dehydratase                                              | 1,00E-161 |
| 2                                 | extended | AciM339_0788 | ABC-type multidrug transport system, ATPase<br>component                                   | 1,00E-13 and<br>5,00E-11 |  | <i>T. zilligii</i>              | daunorubicin ABC<br>transporter ATP-binding<br>protein                              | 6,00E-81  |
| 8                                 | extended | AciM339_0789 | ABC-type multidrug transport system,<br>permease component                                 | 2,00E-40 to<br>1,00E-6   |  | <i>T. zilligii</i>              | ABC transporter                                                                     | 3,00E-56  |
| 18                                | extended | AciM339_0790 | methyltransferase, FkbM family                                                             | 1,00E-39 to<br>2,00E-6   |  | <i>A. boonei</i>                | methyltransferase FkbM<br>family                                                    | 1,00E-123 |
| no hits                           | extended | AciM339_0791 | glycosyl transferase                                                                       | -                        |  | <i>A. boonei</i>                | glycosyl transferase family 2                                                       | 3,00E-112 |
| 12                                | extended | AciM339_0792 | glycosyltransferase                                                                        | 2,00E-53 to<br>7,00E-6   |  | <i>A. boonei</i>                | glycosyl transferase group 1                                                        | 1,00E-105 |
| 13                                | extended | AciM339_0793 | glycosyl/glycerophosphate transferase,<br>teichoic acid biosynthesis                       | 3,00E-70 to<br>3,00E-9   |  | <i>A. boonei</i>                | CDP-glycerol:Poly(glycero-<br>phosphate) glycerophospho-<br>transferase superfamily | 1,00E-68  |
| 2                                 | extended | AciM339_0794 | putative sugar nucleotidyltransferase                                                      | 9,00E-14 and<br>3,00E-24 |  | <i>Maricaulis</i> sp.<br>JL2009 | nucleotidyltransferase                                                              | 7,00E-45  |

|         |           |                                         |                                                             |                         |                                       |                                                 |           |
|---------|-----------|-----------------------------------------|-------------------------------------------------------------|-------------------------|---------------------------------------|-------------------------------------------------|-----------|
| 20      | extended  | AciM339_0795                            | asparagine synthase, glutamine-hydrolyzing                  | 2,00E-47 to<br>2,00E-7  | <i>P. abyssi</i>                      | asparagine synthetase,<br>glutamine-hydrolyzing | 5,00E-146 |
| 6       | extended  | AciM339_0796                            | putative ATPase (AAA+ superfamily)                          | 2,00E-61 to<br>2,00E-13 | uncultured archaeon                   | conserved hypothetical<br>protein               | 9,00E-146 |
| 19      | extended  | AciM339_0797                            | putative ATPase (AAA+ superfamily)                          | 2,00E-63 to<br>1,00E-9  | <i>M. acidiphilum</i>                 | conserved hypothetical<br>protein               | 7,00E-123 |
| 10      | extended  | AciM339_0798                            | hypothetical protein                                        | 1,00E-39 to<br>4,00E-6  | <i>A. boonei</i>                      | hypothetical protein                            | 6,00E-12  |
| 9       | extended  | AciM339_0799                            | Transmembrane exosortase<br>(Exosortase_EpsH)               | 8,00E-63 to<br>4,00E-8  | <i>A. boonei</i>                      | Exosortase EpsH-related<br>protein              | 6,00E-09  |
|         |           | <u>predicted range 706,082..720,183</u> |                                                             |                         |                                       |                                                 |           |
| 10      | predicted | AciM339_0800                            | membrane protein (export of O-antigen and<br>teichoic acid) | 1,00E-62 to<br>9,00E-8  | <i>Methanobrevibacter</i><br>sp. AbM4 | polysaccharide biosynthesis<br>protein          | 6,00E-17  |
| 55      | predicted | AciM339_0801                            | hypothetical protein                                        | 7,00E-70 to<br>1,00E-10 | no hits                               |                                                 |           |
| 8       | predicted | AciM339_0802                            | hypothetical protein                                        | 2,00E-35 to<br>2,00E-10 | <i>A. veneficus</i>                   | nucleotide pyrophosphatase                      | 5,00E-09  |
| 29      | predicted | AciM339_0803                            | glycosyltransferase                                         | 4,00E-58 to<br>4,00E-8  | <i>N. lucentensis</i>                 | glucosyl transferase                            | 8,00E-22  |
| 23      | predicted | AciM339_0804                            | glycosyltransferase                                         | 2,00E-81 to<br>2,00E-6  | <i>N. multiformis</i>                 | group 1 glycosyl transferase                    | 4,00E-32  |
| 8       | predicted | AciM339_0805                            | glycosyltransferase                                         | 1,00E-38 to<br>2,00E-12 | <i>Thermococcus</i> sp.<br>CL1        | glycosyl transferase family<br>protein 8        | 7,00E-76  |
| 6       | predicted | AciM339_0806                            | UDP-N-acetylglucosamine 2-epimerase                         | 1,00E-95 to<br>5,00E-10 | <i>A. boonei</i>                      | UDP-N-acetylglucosamine 2-<br>epimerase         | 1,00E-172 |
| no hits | predicted | AciM339_0807                            | hypothetical protein                                        | -                       | <i>M. fervidus</i>                    | hypothetical protein<br>Mfer_0403               | 5,00E-28  |
| no hits | predicted | AciM339_0808                            | thymidylate kinase                                          | -                       | <i>M. yellowstonensis</i>             | thymidylate kinase                              | 6,00E-11  |
| no hits | predicted | AciM339_0809                            | hypothetical protein                                        | -                       | <i>M. liminatans</i>                  | hypothetical protein                            | 3,00E-38  |

|                                             |           |              |                                                    |                          |                                |                                        |           |
|---------------------------------------------|-----------|--------------|----------------------------------------------------|--------------------------|--------------------------------|----------------------------------------|-----------|
| 6                                           | predicted | AciM339_0810 | putative phosphoesterase, PHP family               | 4,00E-72 to<br>7,00E-6   | <i>M. hungatei</i>             | PHP-like protein                       | 7,00E-28  |
| 10                                          | predicted | AciM339_0811 | putative ATP-grasp enzyme                          | 2,00E-20 to<br>1,00E-6   | <i>D. acetoxidans</i>          | hypothetical protein<br>Desac_1648     | 8,00E-83  |
| no hits                                     | extended  | AciM339_0812 | putative xylanase/chitin deacetylase               | -                        | <i>K. racemifer</i>            | polysaccharide deacetylase             | 9,00E-34  |
| 2                                           | extended  | AciM339_0813 | UDP-N-acetylglucosamine-1-phosphate<br>transferase | 1,00E-22 and<br>4,00E-10 | <i>A. boonei</i>               | glycosyl transferase, family 4         | 8,00E-137 |
| 14                                          | extended  | AciM339_0814 | nucleotide sugar dehydrogenase                     | 2,00E-37 to<br>1,00E-6   | <i>Thermococcus</i> sp.<br>ES1 | NDP-sugar dehydrogenase                | 0.0       |
| 3                                           | extended  | AciM339_0815 | putative dehydrogenase                             | 3,00E-26 to<br>1,00E-8   | <i>M. luminyensis</i>          | hypothetical protein                   | 7,00E-82  |
| 3                                           | extended  | AciM339_0816 | serine acetyltransferase                           | 1,00E-14                 | no hits                        |                                        |           |
| <i>potential genomic island 3</i>           |           |              |                                                    |                          |                                |                                        |           |
| <u>extended range 1,083,982..1,105,557</u>  |           |              |                                                    |                          |                                |                                        |           |
| 25                                          | extended  | AciM339_1215 | hypothetical protein                               | 8,00E-54 to<br>1,00E-7   | <i>A. boonei</i>               | hypothetical protein                   | 4,00E-10  |
| 29                                          | extended  | AciM339_1216 | DNA/RNA helicase, superfamily II                   | 3,00E-50 to<br>2,00E-6   | <i>A. boonei</i>               | hypothetical protein                   | 0.0       |
| 69                                          | extended  | AciM339_1217 | adenine specific DNA methylase Mod                 | 6,00E-75 to<br>1,00E-6   | <i>A. boonei</i>               | DNA methylase domain<br>protein        | 0.0       |
| 79                                          | extended  | AciM339_1218 | DNA/RNA helicase, superfamily I                    | 7,00E-61 to<br>4,00E-6   | <i>A. boonei</i>               | UvrD/REP helicase domain<br>protein    | 0.0       |
| 7                                           | extended  | AciM339_1219 | hypothetical protein                               | 4,00E-54 to<br>5,00E-14  | <i>M. hollandica</i>           | molecular chaperone of<br>HSP90 family | 2,00E-07  |
| 2                                           | extended  | AciM339_1220 | hypothetical protein                               | 2,00E-26 and<br>7,00E-6  | no hits                        |                                        |           |
| <u>predicted range 1,096,394..1,101,344</u> |           |              |                                                    |                          |                                |                                        |           |
| 38                                          | predicted | AciM339_1221 | Lhr-like helicase                                  | 6,00E-57 to<br>4,00E-6   | <i>C. saccharofermentans</i>   | hypothetical protein                   | 9,00E-174 |

|                                            |           |              |                                                  |                         |                              |                               |           |
|--------------------------------------------|-----------|--------------|--------------------------------------------------|-------------------------|------------------------------|-------------------------------|-----------|
| 32                                         | predicted | AciM339_1222 | ATPase                                           | 1,00E-49 to<br>1,00E-6  | <i>C. saccharofermentans</i> | hypothetical protein          | 1,00E-83  |
| 44                                         | predicted | AciM339_1223 | unknown function                                 | 3,00E-52 to<br>2,00E-6  | <i>C. saccharofermentans</i> | hypothetical protein          | 2,00E-159 |
| 35                                         | predicted | AciM339_1224 | hypothetical protein                             | 2,00E-75 to<br>2,00E-7  | <i>C. saccharofermentans</i> | hypothetical protein          | 9,00E-52  |
| <u>extended range 1,083,982..1,105,557</u> |           |              |                                                  |                         |                              |                               |           |
| 11                                         | extended  | AciM339_1225 | hypothetical protein                             | 7,00E-61 to<br>8,00E-8  | no hits                      |                               |           |
| 5                                          | extended  | AciM339_1226 | hypothetical protein                             | 7,00E-61 to<br>6,00E-16 | no hits                      |                               |           |
| 10                                         | extended  | AciM339_1227 | hypothetical protein                             | 1,00E-34 to<br>1,00E-7  | no hits                      |                               |           |
| 27                                         | extended  | AciM339_1228 | hypothetical protein                             | 2,00E-72 to<br>2,00E-7  | no hits                      |                               |           |
| 4                                          | extended  | AciM339_1229 | hypothetical protein                             | 9,00E-40 to<br>6,00E-11 | no hits                      |                               |           |
| 2                                          | extended  | AciM339_1230 | hypothetical protein                             | 1,00E-31 and<br>2,00E-8 | no hits                      |                               |           |
| 5                                          | extended  | AciM339_1231 | hypothetical protein                             | 4,00E-10 to<br>2,00E-6  | no hits                      |                               |           |
| <i>potential genomic island 4</i>          |           |              |                                                  |                         |                              |                               |           |
| <u>extended range 1,216,880..1,229,475</u> |           |              |                                                  |                         |                              |                               |           |
| 13                                         | extended  | AciM339_1347 | glutamate dehydrogenase/leucine<br>dehydrogenase | 1,00E-45 to<br>4,00E-7  | no hits                      |                               |           |
| 5                                          | extended  | AciM339_1349 | glycosyl transferase                             | 8,00E-51 to<br>7,00E-9  | <i>A. boonei</i>             | glycosyl transferase family 2 | 0.0       |
| <u>predicted 1,219,892..1,229,434</u>      |           |              |                                                  |                         |                              |                               |           |
| 11                                         | predicted | AciM339_1350 | TIGR02688 family protein                         | 5,00E-39 to<br>6,00E-8  | <i>T. petrophila</i>         | hypothetical protein          | 0.0       |



|                                             |           |              |                                      |                         |                              |                                              |           |
|---------------------------------------------|-----------|--------------|--------------------------------------|-------------------------|------------------------------|----------------------------------------------|-----------|
| 39                                          | predicted | AciM339_1351 | hypothetical protein                 | 2,00E-28 to<br>1,00E-6  | <i>T. petrophila</i>         | hypothetical protein                         | 0.0       |
| 56                                          | predicted | AciM339_1352 | hypothetical protein                 | 1,00E-41 to<br>2,00E-6  | <i>T. petrophila</i>         | hypothetical protein                         | 0.0       |
| 57                                          | predicted | AciM339_1353 | PAPS reductase/FAD synthetase family | 2,00E-56 to<br>2,00E-6  | <i>M. thermautotrophicus</i> | phosphoadenosine<br>phosphosulfate reductase | 0.0       |
| <i>potential genomic island 5</i>           |           |              |                                      |                         |                              |                                              |           |
| <u>predicted range 1,377,646..1,382,742</u> |           |              |                                      |                         |                              |                                              |           |
| 14                                          | predicted | AciM339_1513 | DEAD/DEAH box helicase               | 1,00E-43 to<br>5,00E-6  | <i>T. sibiricus</i>          | hypothetical protein                         | 0.0       |
| 3                                           | predicted | AciM339_1514 | CRISPR-associated protein            | 1,00E-62 to<br>7,00E-21 | <i>T. sibiricus</i>          | hypothetical protein                         | 8,00E-80  |
| 4                                           | predicted | AciM339_1515 | CRISPR-associated protein            | 9,00E-29 to<br>6,00E-7  | <i>T. sibiricus</i>          | hypothetical protein                         | 2,00E-141 |
| 12                                          | predicted | AciM339_1516 | hypothetical protein                 | 3,00E-38 to<br>5,00E-6  | <i>T. sibiricus</i>          | hypothetical protein                         | 1,00E-149 |
| <u>extended range 1,377,325..1,384,042</u>  |           |              |                                      |                         |                              |                                              |           |
| 3                                           | extended  | AciM339_1517 | CRISPR-associated endoribonuclease   | 2,00E-35 to<br>6,00E-30 | <i>A. boonei</i>             | CRISPR-associated protein                    | 2,00E-35  |
| 14                                          | extended  | AciM339_1517 | phosphoesterase                      | 3,00E-61 to<br>2,00E-7  | <i>T. thermarum</i>          | CRISPR-associated protein                    | 2,00E-31  |

71

72 Abbreviations used in the table denote: *Aciduliprofundum boonei*, *Archaeoglobus veneficus*, *Caldatribacterium saccharofermentans*, *Desulfobacca*  
73 *acetoxidans*, *Ktedonobacter racemifer*, *Metallosphaera yellowstonensis*, *Methanofollis liminatans*, *Methanomassiliicoccus luminyensis*,  
74 *Methanomethylophilus alvus*, *Methanomethylovorans hollandica*, *Methanospirillum hungatei*, *Methanothermobacter thermautotrophicus*,  
75 *Methanothermus fervidus*, *Micrarchaeum acidiphilum*, *Nitrosospira multiformis*, *Nocardiopsis lucentensis*, *Pyrococcus abyssi*, *Thermococcus*  
76 *sibiricus*, *Thermococcus zigli*, *Thermotoga thermarum* and *Thermotoga petrophila*.

77 **References**

- 78 1. **Xie W, Wang F, Guo L, Chen Z, Sievert SM, Meng J, Huang G, Li Y, Yan Q, Wu**  
79 **S, Wang X, Chen S, He G, Xiao X, Xu A.** 2010. Comparative metagenomics of  
80 microbial communities inhabiting deep-sea hydrothermal vent chimneys with  
81 contrasting chemistries. *ISME J.* **5**:414-426.
- 82 2. **Nakai R, Abe T, Takeyama H, Naganuma T.** 2011. Metagenomic analysis of 0.2-  
83  $\mu\text{m}$ -passable microorganisms in deep-sea hydrothermal fluid. *Mar. Biotechnol.*  
84 **13**:900-908.
- 85 3. **Biddle JF, White JR, Teske AP, House CH.** 2011. Metagenomics of the subsurface  
86 Brazos-Trinity Basin (IODP site 1320): comparison with other sediment and  
87 pyrosequenced metagenomes. *ISME J.* **5**:1038-1047.
- 88
- 89
